# Supplementary material
Source: publisher figshare collection journal article supplement (https://acs.figshare.com/ndownloader/files/4402312)
Supplement: Supplementary file 1 [file 4402312]

## SUPPORTING INFORMATION

### Thiolate-Protected Au<sub>25</sub> Superatoms as Building Blocks: Dimers and Crystals

*Jaakko Akola,<sup>1,2</sup> Katarzyna A. Kacprzak,<sup>1</sup> Olga Lopez-Acevedo,<sup>1</sup> Michael Walter,<sup>1,#</sup> Henrik Grönbeck<sup>3</sup> and Hannu Häkkinen<sup>1,4\*</sup>*

<sup>1</sup> Department of Physics, Nanoscience Center, University of Jyväskylä, P.O. Box 35, FI-40014 Jyväskylä, Finland

<sup>2</sup> Department of Physics, Tampere University of Technology, P.O. Box 692, FI-33101 Tampere, Finland

<sup>3</sup> Department of Applied Physics and Competence Centre for Catalysis, Chalmers University of Technology, SE-412 96 Göteborg, Sweden.

<sup>4</sup> Department of Chemistry, Nanoscience Center, University of Jyväskylä, P.O. Box 35, FI-40014 Jyväskylä, Finland

<sup>#</sup> Present address: Freiburg Materials Research Center, University of Freiburg, D-79104 Freiburg i. Br., Germany

\* Corresponding author, email: [hannu.j.hakkinen@jyu.fi](mailto:hannu.j.hakkinen@jyu.fi)

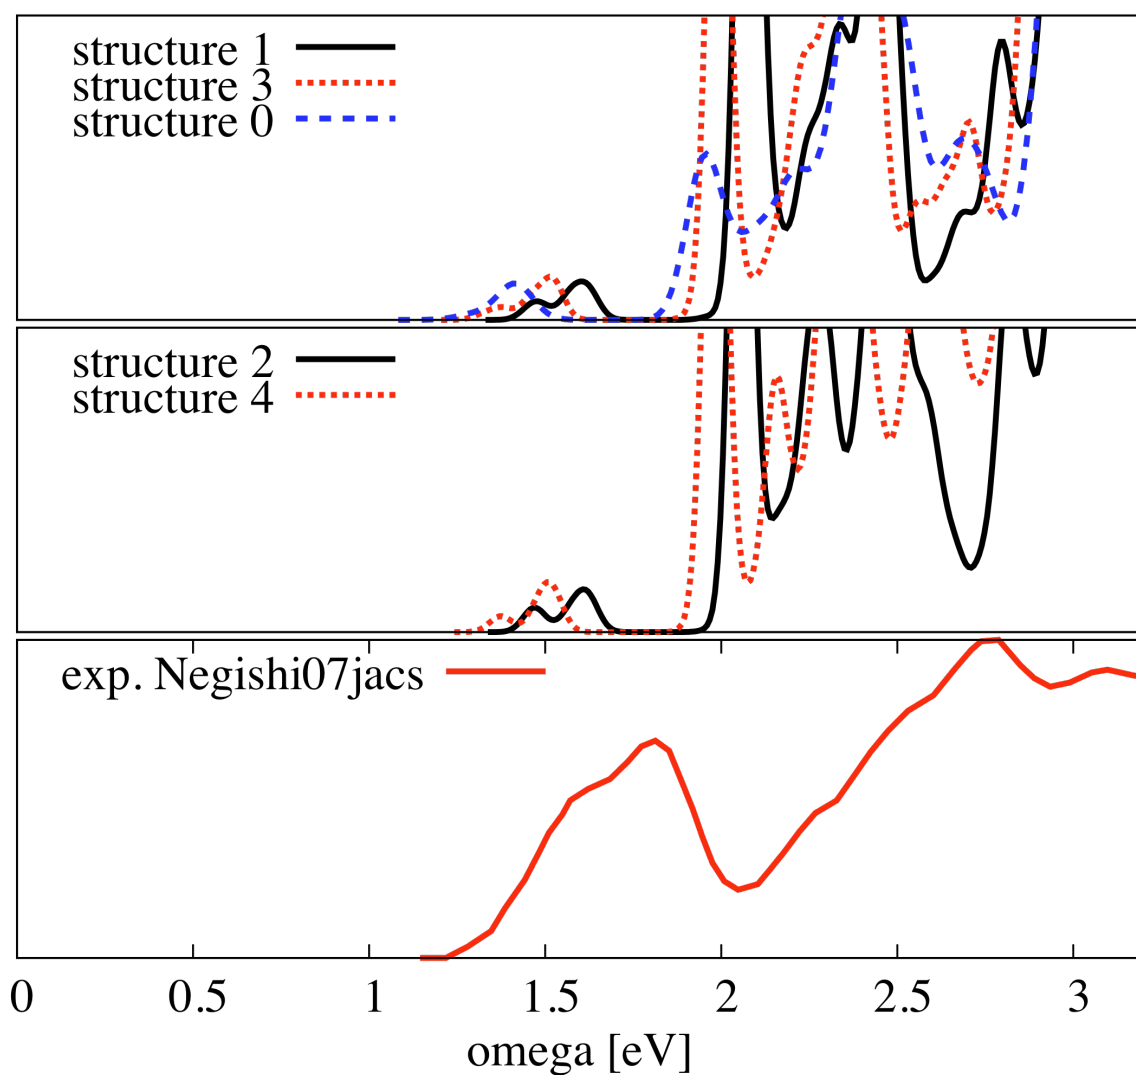

**Figure S-1.** Calculated optical spectra of  $\text{Au}_{25}(\text{SEtPh})_{18}^{-1}$  and its complex with TOA+ from the experimental data (ref. 16 in the main text). 1: The cluster anion as extracted from the experimental data; 2: the cluster anion + counterion as extracted; 3: system 1 relaxed in gas-phase; 4: system 2 relaxed in gas-phase. System 0: relaxed  $\text{Au}_{25}(\text{SMe})_{18}^{-1}$  in gas-phase (ref. 18 in the main text). The experimental curve is for hexyl-thiolate-protected  $\text{Au}_{25}(\text{SHex})_{18}^{-1}$  from ref. 13a in the main text.

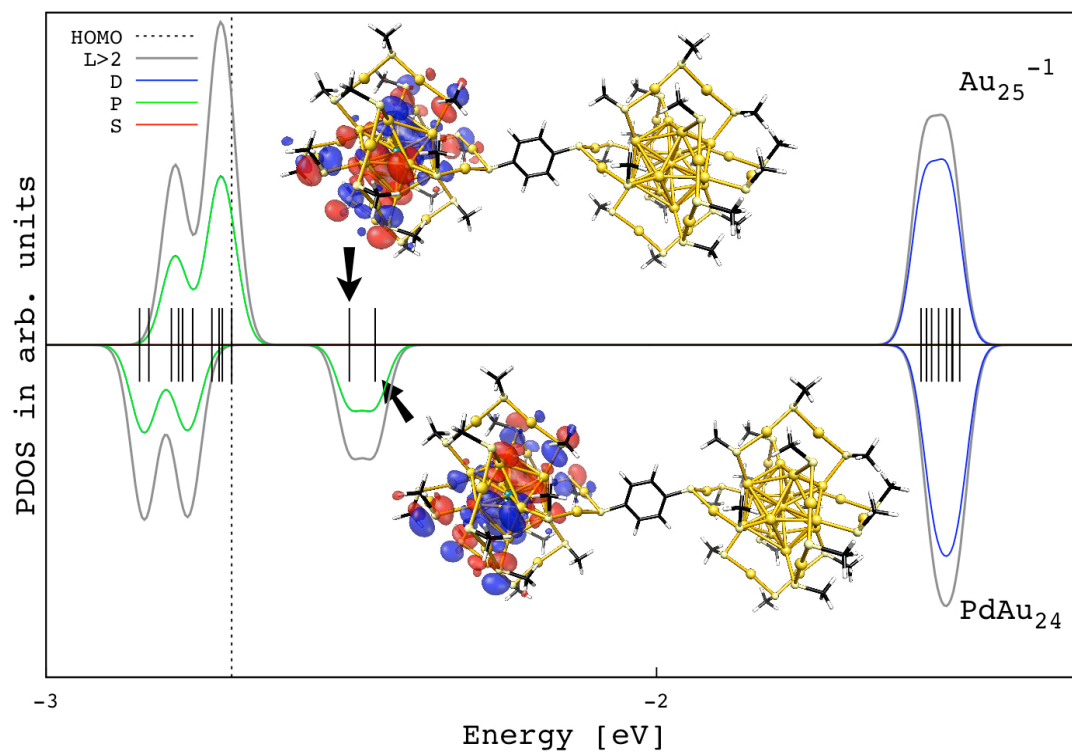

**Figure S-2.** The electron density of states of dimer **4** and its projections to spherical harmonics ( $L = 0, 1, 2$ ). The superatomic electron count is 14, and the dimer can be understood in terms of a closed-shell  $\text{Au}_{25}^{-1}$  and a 6-electron  $\text{PdAu}_{24}$  with two holes in the P-like shell of  $\text{PdAu}_{24}$ . The localized hole states are visualized with red (positive amplitude) and blue (negative) isosurfaces.
